# Supplementary material
Source: Springer Nature journal article supplement (https://www.springermedizin.de/resource/supplementary/12985_2012_2126_MOESM7_ESM.pdf/9606092)

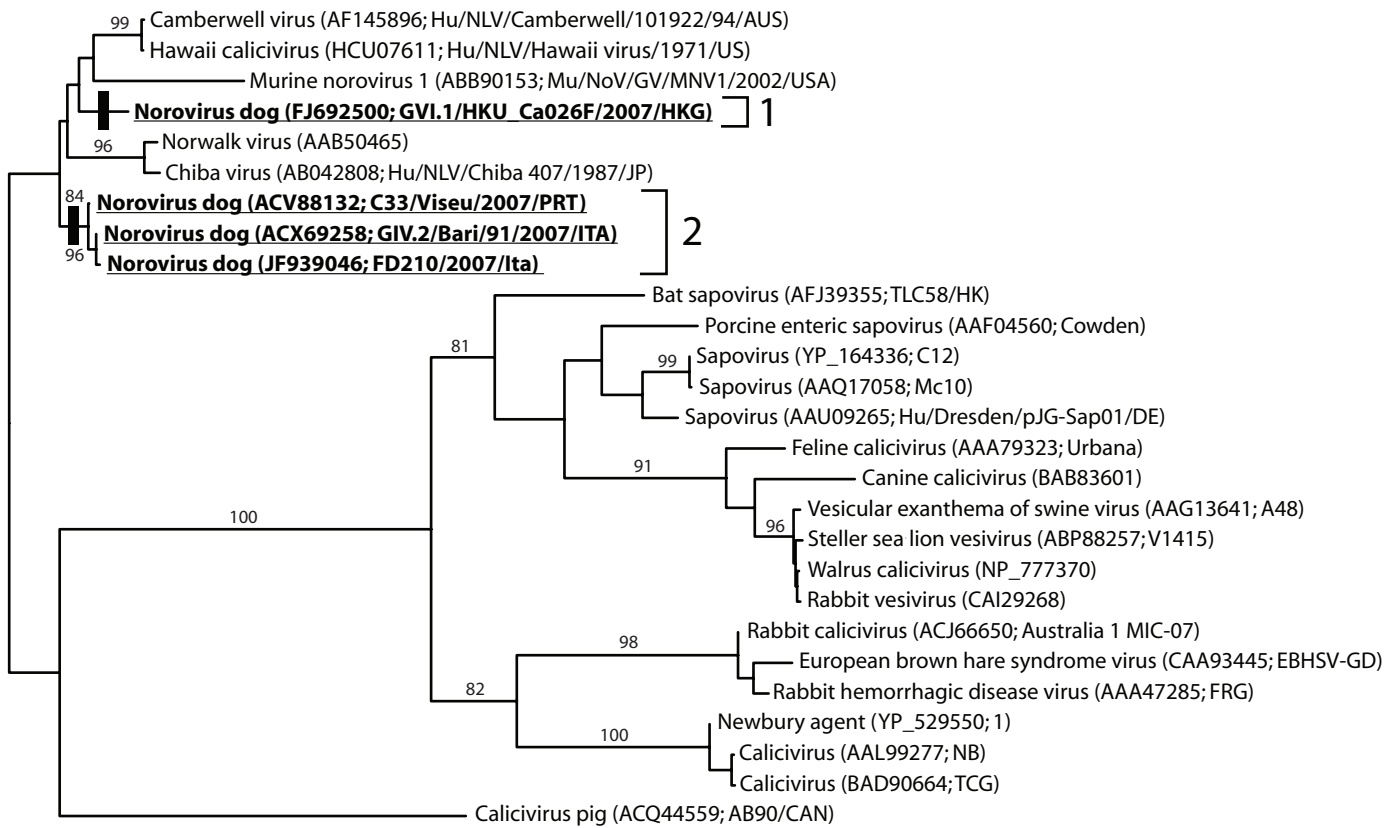

| rank | tree | $\Delta \ln$ | AU    | np    | bp    | pp    | kh    | sh    | wkh   | wsh   | constraint | # s2m gains |
|------|------|--------------|-------|-------|-------|-------|-------|-------|-------|-------|------------|-------------|
| 1    | 1    | -3.4         | 0.820 | 0.583 | 0.581 | 0.959 | 0.736 | 0.919 | 0.736 | 0.943 | none       | 2           |
| 2    | 2    | 3.4          | 0.454 | 0.158 | 0.155 | 0.031 | 0.264 | 0.727 | 0.264 | 0.713 | (1,2)      | 1           |

Supplement: MOESM7 [file 9606092]
